# Supplementary material for: Insulin-producing Cells from Adult Human Bone Marrow Mesenchymal Stromal Cells Could Control Chemically Induced Diabetes in Dogs: A Preliminary Study
Source: PubMed Central journal article supplement — Cell Transplant. 2018 Jun 4;27(6):937–47. doi: 10.1177/0963689718759913 (PMC6050912; doi:10.1177/0963689718759913), 2018-06-04
Supplement: supplemental_materials.pdf [file supplemental_materials.pdf]

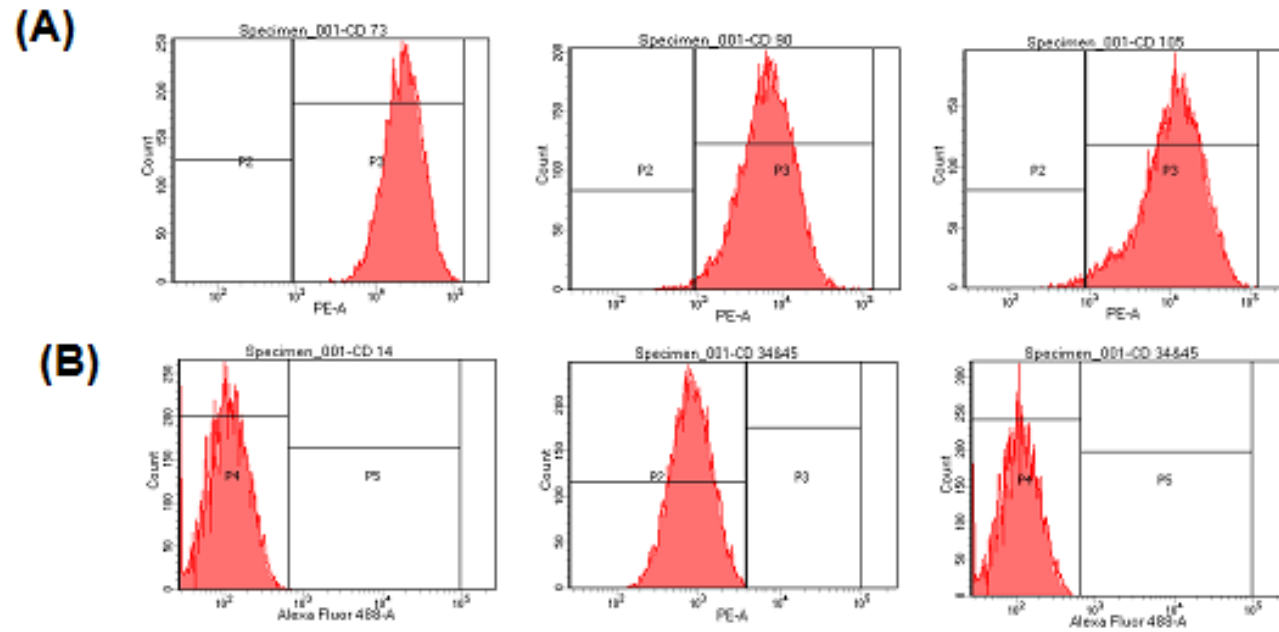

**Supplementary figure 1:** Flow-cytometry of MSCs revealed that the cells expressed high levels of CD73, CD90, and CD105 (panel A) but negligible levels of CD14, CD34, and CD45 (Panel B).

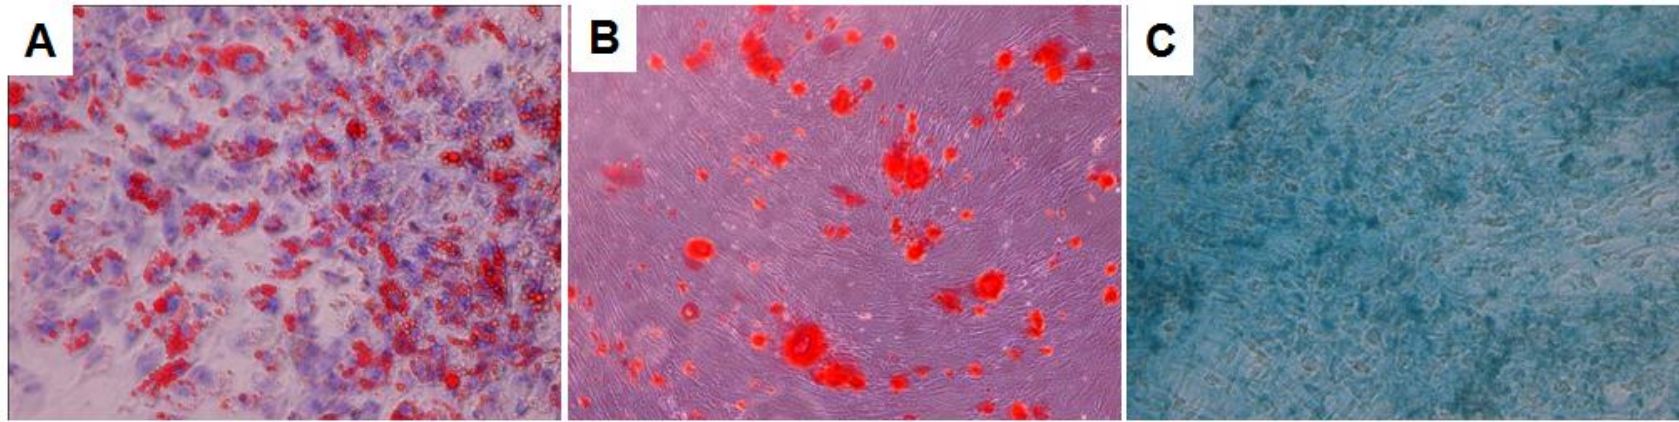

**Supplementary figure 2:** Multilineage differentiation of BM-MSCs

- A. Adipogenesis was detected using Oil-Red-O staining
- B. osteogenesis was detected using alizarin-red staining
- C. chondrogenesis was detected using Alcian blue

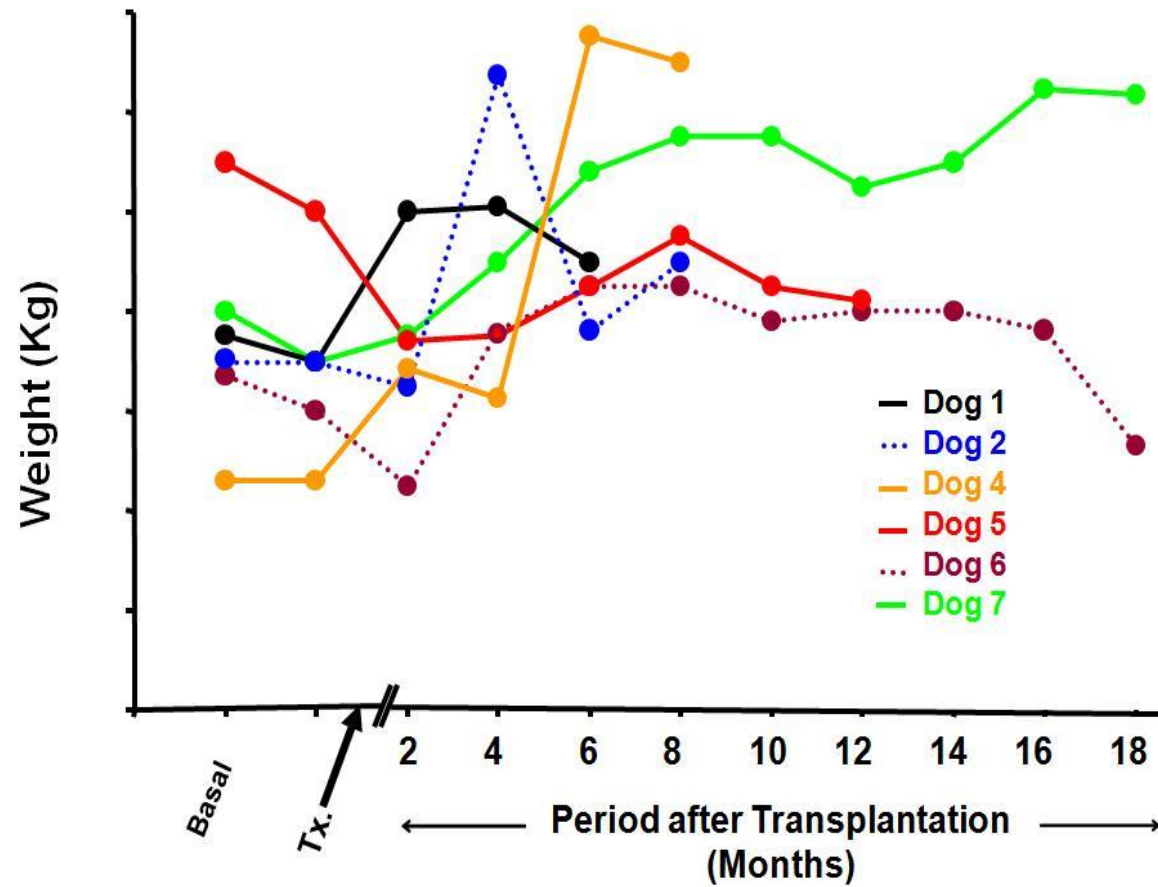

**Supplementary figure 3:** The weight of the treated animals. After induction of diabetes, the weight of all the animals was reduced for a period of 2-3 months. Thereafter, there was a gradual increase even among the 2 dogs in which their diabetes was partially controlled.

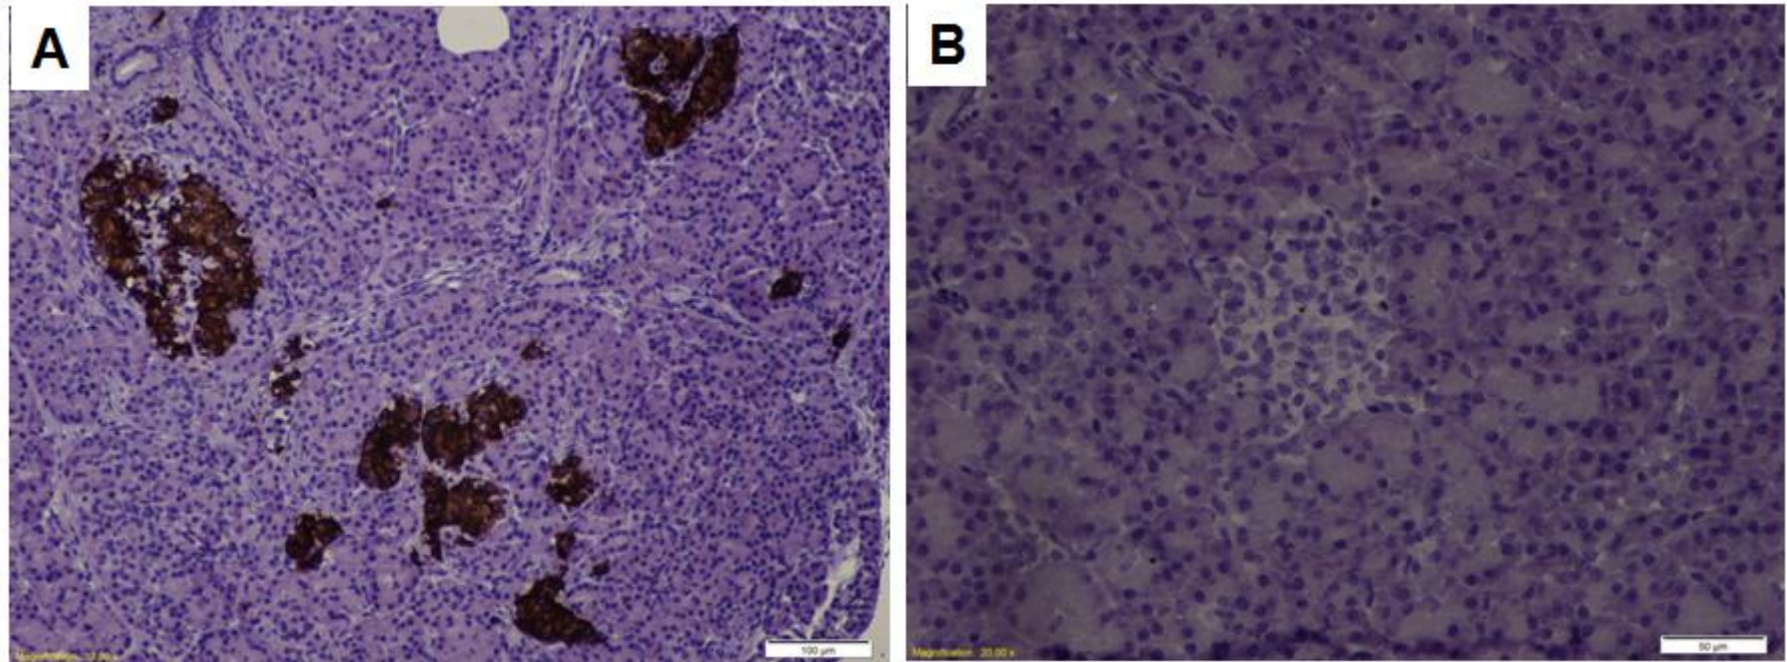

**Supplementary figure 4: Immunostaining of a dog pancreas.**

- A.** The islets from pancreas harvested from normal untreated dog stained positive for insulin.
- B.** The islets from a pancreas of a cured dog retrieved 18 months post transplant were atrophic and negatively stained for insulin.

Supplementary table 1: K-value calculations

| Normal Dogs                                          | Cured dogs                                           | Partially controlled dogs                             |
|------------------------------------------------------|------------------------------------------------------|-------------------------------------------------------|
| $K = \frac{\ln BLS1 - \ln BLS2}{t2 - t1} \times 100$ | $K = \frac{\ln BLS1 - \ln BLS2}{t2 - t1} \times 100$ | $K = \frac{\ln BLS1 - \ln BLS2}{t2 - t1} \times 100$  |
| $K = \frac{\ln 212 - \ln 108}{120 - 30} \times 100$  | $K = \frac{\ln 290 - \ln 152}{120 - 30} \times 100$  | $K = \frac{\ln 531.5 - \ln 344}{120 - 30} \times 100$ |
| $K = \frac{5.356 - 4.680}{90} \times 100$            | $K = \frac{5.67 - 5.02}{90} \times 100$              | $K = \frac{6.275 - 5.84}{90} \times 100$              |
| $K = \frac{0.676}{90} \times 100$                    | $K = \frac{0.65}{90} \times 100$                     | $K = \frac{0.435}{90} \times 100$                     |
| $K = 0.75\%$                                         | $K = 0.72\%$                                         | $K = 0.48\%$                                          |

**Supplementary table 2: Fasting Blood Sugar (mg/dl)**

|        | Age<br>months | Basal before<br>induction of<br>diabetes | After<br>induction<br>of diabetes | Period After Transplantation ( months) |     |     |     |     |     |     |     |     |  |
|--------|---------------|------------------------------------------|-----------------------------------|----------------------------------------|-----|-----|-----|-----|-----|-----|-----|-----|--|
|        |               |                                          |                                   | 2                                      | 4   | 6   | 8   | 10  | 12  | 14  | 16  | 18  |  |
| Dog 1  | 9             | 76                                       | 277                               | 98                                     | 80  | 95  |     |     |     |     |     |     |  |
| Dog 2* | 8             | 101                                      | 276                               | 223                                    | 178 | 228 | 188 |     |     |     |     |     |  |
| Dog 4  | 8             | 154                                      | 407                               | 125                                    | 134 | 101 | 77  |     |     |     |     |     |  |
| Dog 5  | 7             | 76                                       | 285                               | 73                                     | 134 | 91  | 95  | 86  | 65  |     |     |     |  |
| Dog 6* | 10            | 138                                      | 346                               | 219                                    | 237 | 216 | 249 | 262 | 245 | 191 | 197 | 225 |  |
| Dog 7  | 12            | 128                                      | 285                               | 128                                    | 93  | 82  | 78  | 89  | 76  | 70  | 88  | 72  |  |

*\* Dogs # 2 and 6: Were partially controlled.*

*Dog # 3 : Died 4 days after transplantation from pneumonia.*

**Supplementary table 3: Human Insulin Levels ( $\mu$ IU/mL)**

|        | Basal before induction of diabetes | After induction of diabetes | Period After Transplantation ( months) |    |    |    |    |    |    |    |    |
|--------|------------------------------------|-----------------------------|----------------------------------------|----|----|----|----|----|----|----|----|
|        |                                    |                             | 2                                      | 4  | 6  | 8  | 10 | 12 | 14 | 16 | 18 |
| Dog 1  | 0.0                                | 0.0                         | 27                                     | 22 | 25 |    |    |    |    |    |    |
| Dog 2* | 0.0                                | 0.0                         | 30                                     | 14 | 26 | 18 |    |    |    |    |    |
| Dog 4  | 0.0                                | 0.0                         | 32                                     | 18 | 35 | 36 |    |    |    |    |    |
| Dog 5  | 0.0                                | 0.0                         | 17                                     | 40 | 36 | 32 | 45 | 28 |    |    |    |
| Dog 6* | 0.0                                | 0.0                         | 10.5                                   | 32 | 23 | 17 | 15 | 18 | 15 | 16 | 22 |
| Dog 7  | 0.0                                | 0.0                         | 27                                     | 32 | 36 | 21 | 25 | 32 | 26 | 23 | 33 |

*\* Dogs # 2 and 6: Were partially controlled.*

*Dog # 3 : Died 4 days after transplantation from pneumonia.*

**Supplementary table 4: Human C-peptide Levels (ng/ml)**

|        | Basal before induction of diabetes | After induction of diabetes | Period After Transplantation ( months) |     |      |     |     |     |     |      |     |
|--------|------------------------------------|-----------------------------|----------------------------------------|-----|------|-----|-----|-----|-----|------|-----|
|        |                                    |                             | 2                                      | 4   | 6    | 8   | 10  | 12  | 14  | 16   | 18  |
| Dog 1  | 0.0                                | 0.0                         | 0.3                                    | 0.4 | 0.2  |     |     |     |     |      |     |
| Dog 2* | 0.0                                | 0.0                         | 0.4                                    | 0.2 | 0.3  | 0.3 |     |     |     |      |     |
| Dog 4  | 0.0                                | 0.0                         | 0.4                                    | 0.3 | 0.5  | 0.6 |     |     |     |      |     |
| Dog 5  | 0.0                                | 0.0                         | 0.3                                    | 0.6 | 0.4  | 0.4 | 0.6 | 0.4 |     |      |     |
| Dog 6* | 0.0                                | 0.0                         | 0.2                                    | 0.3 | 0.4  | 0.2 | 0.2 | 0.2 | 0.2 | 0.2  | 0.3 |
| Dog 7  | 0.0                                | 0.0                         | 0.3                                    | 0.3 | 0.47 | 0.3 | 0.3 | 0.5 | 0.3 | 0.35 | 0.5 |

*\* Dogs # 2 and 6 : Were partially controlled.*

*Dog # 3 : Died 4 days after transplantation from pneumonia.*



**Supplementary table 5: Canine Insulin Levels ( $\mu$ U/ml)**

|        | Basal before induction of diabetes | After induction of diabetes | Period After Transplantation ( months) |     |     |     |     |     |     |     |     |
|--------|------------------------------------|-----------------------------|----------------------------------------|-----|-----|-----|-----|-----|-----|-----|-----|
|        |                                    |                             | 2                                      | 4   | 6   | 8   | 10  | 12  | 14  | 16  | 18  |
| Dog 1  | 25                                 | 0.0                         | 0.0                                    | 1.0 | 1.0 |     |     |     |     |     |     |
| Dog 2* | 35                                 | 1                           | 1.0                                    | 0.0 | 0.0 | 0.0 |     |     |     |     |     |
| Dog 4  | 26                                 | 0.0                         | 3.0                                    | 0.0 | 0.0 | 0.0 |     |     |     |     |     |
| Dog 5  | 35                                 | 6.0                         | 2.0                                    | 3.0 | 0.0 | 0.0 | 0.0 | 0.0 |     |     |     |
| Dog 6* | 20                                 | 0.0                         | 0.0                                    | 2.0 | 2.0 | 0.0 | 2.0 | 2.0 | 5.0 | 0.0 | 0.0 |
| Dog 7  | 12                                 | 0.0                         | 0.0                                    | 4   | 1.0 | 1.0 | 1.0 | 2.0 | 0.0 | 0.0 | 0.0 |

*\* Dogs # 2 and 6 : Were partially controlled.*

*Dog # 3 : Died 4 days after transplantation from pneumonia.*

**Supplementary table 6: Canine C-peptide Levels (ng/ml)**

|        | Basal before induction of diabetes | After induction of diabetes | Period After Transplantation ( months) |      |     |     |     |      |     |     |     |
|--------|------------------------------------|-----------------------------|----------------------------------------|------|-----|-----|-----|------|-----|-----|-----|
|        |                                    |                             | 2                                      | 4    | 6   | 8   | 10  | 12   | 14  | 16  | 18  |
| Dog 1  | 0.5                                | 0.0                         | 0.0                                    | 0.0  | 0.0 |     |     |      |     |     |     |
| Dog 2* | 0.6                                | 0.1                         | 0.0                                    | 0.0  | 0.0 | 0.0 |     |      |     |     |     |
| Dog 4  | 0.4                                | 0.0                         | 0.0                                    | 0.0  | 0.0 | 0.0 |     |      |     |     |     |
| Dog 5  | 0.7                                | 0.05                        | 0.0                                    | 0.09 | 0.0 | 0.0 | 0.0 | 0.0  |     |     |     |
| Dog 6* | 0.5                                | 0.0                         | 0.04                                   | 0.0  | 0.0 | 0.0 | 0.0 | 0.02 | 0.0 | 0.0 | 0.0 |
| Dog 7  | 0.6                                | 0.0                         | 0.045                                  | 0.0  | 0.0 | 0.0 | 0.0 | 0.07 | 0.0 | 0.0 | 0.0 |

*\* Dogs # 2 and 6 : Were partially controlled.*

*Dog # 3 : Died 4 days after transplantation from pneumonia.*

**Supplementary table 7: Weight (Kg)**

|        | Basal before induction of diabetes | After induction of diabetes | Period After Transplantation ( months) |       |      |      |      |      |    |       |       |  |
|--------|------------------------------------|-----------------------------|----------------------------------------|-------|------|------|------|------|----|-------|-------|--|
|        |                                    |                             | 2                                      | 4     | 6    | 8    | 10   | 12   | 14 | 16    | 18    |  |
| Dog 1  | 13.5                               | 13                          | 16                                     | 16.1  | 15   |      |      |      |    |       |       |  |
| Dog 2* | 13                                 | 13                          | 12.5                                   | 18.75 | 13.6 | 15   |      |      |    |       |       |  |
| Dog 4  | 10.6                               | 10.6                        | 12.85                                  | 12.25 | 19.5 | 19   |      |      |    |       |       |  |
| Dog 5  | 17                                 | 16                          | 13.4                                   | 13.5  | 14.5 | 15.5 | 14.5 | 14.2 |    |       |       |  |
| Dog 6* | 12.7                               | 12                          | 10.5                                   | 13.6  | 14.5 | 14.5 | 13.8 | 14   | 14 | 13.6  | 11.3  |  |
| Dog 7  | 14                                 | 13                          | 13.5                                   | 15    | 16.8 | 17.5 | 17.5 | 16.5 | 17 | 18.45 | 18.35 |  |

*\* Dogs # 2 and 6 : Were partially controlled.*

*Dog # 3 : Died 4 days after transplantation from pneumonia.*

**Supplementary table 8: Intravenous glucose tolerance test of the dogs**

*Serum glucose levels (mg/dl), 6 months post-transplant*

| <b>Cured Dogs</b> |              |                 |                 |                 |                  |                  |
|-------------------|--------------|-----------------|-----------------|-----------------|------------------|------------------|
| <b>Dogs No.</b>   | <b>Basal</b> | <b>30 mins.</b> | <b>60 mins.</b> | <b>90 mins.</b> | <b>120 mins.</b> | <b>180 mins.</b> |
| 1                 | 98           | 249             | 188             | 175             | 132              | 112              |
| 4                 | 122          | 354             | 345             | 266             | 239              | 76               |
| 5                 | 99           | 230             | 168             | 163             | 133              | 109              |
| 7                 | 74           | 331             | 284             | 195             | 171              | 88               |
| <b>Median</b>     | <b>98.5</b>  | <b>290</b>      | <b>236</b>      | <b>185</b>      | <b>152</b>       | <b>98.5</b>      |

| <b>Partially Controlled Dogs</b> |              |                 |                 |                 |                  |                  |
|----------------------------------|--------------|-----------------|-----------------|-----------------|------------------|------------------|
| <b>Dogs No.</b>                  | <b>Basal</b> | <b>30 mins.</b> | <b>60 mins.</b> | <b>90 mins.</b> | <b>120 mins.</b> | <b>180 mins.</b> |
| 2                                | 281          | 553             | 520             | 391             | 341              | 284              |
| 6                                | 238          | 510             | 387             | 398             | 347              | 278              |
| <b>Median</b>                    | <b>259.5</b> | <b>531.5</b>    | <b>453.5</b>    | <b>394.5</b>    | <b>344</b>       | <b>281</b>       |

**Supplementary table 9: Intravenous glucose tolerance test (1g/Kg) of the Dogs**  
***Serum human insulin ( $\mu$ U/ml), 6 months post-transplant***

| <b>Dog No.</b> | <b>Basal</b> | <b>30 mins</b> | <b>60 mins</b> | <b>90 mins</b> | <b>120 mins</b> |
|----------------|--------------|----------------|----------------|----------------|-----------------|
| 1*             | 28           | 55             | 35             | 34             | 26              |
| 2**            | 18           | 22             | 22             | 20             | 19              |
| 4*             | 32           | 47             | 42             | 36             | 34              |
| 5*             | 25           | 36             | 34             | 33             | 32              |
| 6**            | 15           | 35             | 26             | 22             | 20              |
| 7*             | 25           | 45             | 38             | 32             | 25              |

- ***Cured dogs***
- ***\*\* Partially controlled***

**Supplementary table 10: Intravenous glucose tolerance test (1g/Kg) of the Dogs**  
***Serum canine insulin ( $\mu$ U/ml), 6 months post-transplant***

| <b>Dog No.</b> | <b>Basal</b> | <b>30 mins</b> | <b>60 mins</b> | <b>90 mins</b> | <b>120 mins</b> |
|----------------|--------------|----------------|----------------|----------------|-----------------|
| 1*             | 1.0          | 1.0            | 1.0            | 1.0            | 1.8             |
| 2**            | 0.0          | 0.0            | 0.0            | 0.0            | 0.0             |
| 4*             | 0.0          | 0.0            | 0.0            | 0.0            | 0.0             |
| 5*             | 1.0          | 2.0            | 2.0            | 2.0            | 1.0             |
| 6**            | 2.0          | 5.0            | 4.0            | 3.0            | 3.0             |
| 7*             | 1.0          | 3.0            | 2.0            | 2.0            | 2.0             |

\* ***Cured dogs***

\*\* ***Partially controlled***

**Supplementary table 11: Intravenous glucose tolerance test for normal dogs (1mg/kgm)  
Serum glucose levels (1mg/dl)**

| <b>Normal Dogs</b> |                |                 |                 |                 |                  |
|--------------------|----------------|-----------------|-----------------|-----------------|------------------|
| <b>Dogs No.</b>    | <b>Fasting</b> | <b>30 mins.</b> | <b>60 mins.</b> | <b>90 mins.</b> | <b>120 mins.</b> |
| A                  | 154            | 375             | 255             | 182             | 150              |
| B                  | 101            | 157             | 116             | 114             | 108              |
| C                  | 95             | 212             | 159             | 110             | 97               |
| <b>Median</b>      | <b>101</b>     | <b>212</b>      | <b>159</b>      | <b>114</b>      | <b>108</b>       |

**Supplementary table 12: Relative gene expression**

|             | <b>Undiff</b>      | <b>End of in vitro diff</b> | <b>6 months</b>    | <b>8 months</b>    | <b>12 months</b> | <b>18 months</b>   | <b>Human Islets</b> |
|-------------|--------------------|-----------------------------|--------------------|--------------------|------------------|--------------------|---------------------|
| PDX1        | 0.0004             | 0.0051                      | 0.0324             |                    |                  | 0.020905           | 1                   |
|             | 0.0000603          | 0.000224                    | 0.000779           |                    |                  | 0.00296            | 1                   |
|             | 0.000924           | 0.00145                     | 0.0249132          | 0.019375           |                  |                    | 1                   |
|             | 0.0000603          | 0.00021                     |                    | 0.000713           |                  |                    | 1                   |
|             | 0.000527           | 0.0021                      |                    | 0.024369           |                  |                    | 1                   |
|             | 0.0004             | 0.000224                    |                    | 0.1058322          | 0.036478         |                    | 1                   |
| <b>Mean</b> | <b>0.000395267</b> | <b>0.00201333</b>           | <b>0.019364067</b> | <b>0.037572300</b> | <b>0.036478</b>  | <b>0.011932500</b> | <b>1</b>            |
| INS         |                    | 0.0004                      | 0.0056             |                    |                  | 0.021344           | 1                   |
|             | 0.000018           | 0.000126                    | 0.004437           |                    |                  | 0.021487           | 1                   |
|             | 0.0000407          | 0.000193                    | 0.0086437          | 0.001069           |                  |                    | 1                   |
|             | 0.000018           | 0.0000654                   |                    | 0.002753           |                  |                    | 1                   |
|             | 0.0000147          | 0.0004                      |                    | 0.002577           |                  |                    | 1                   |
|             |                    | 0.000126                    |                    | 0.0035353          | 0.017259         |                    | 1                   |
| <b>Mean</b> | <b>0.000022850</b> | <b>0.000218400</b>          | <b>0.006226900</b> | <b>0.002483575</b> | <b>0.017259</b>  | <b>0.021415500</b> | <b>1</b>            |
| GCG         | 0.0007             | 0.0043                      | 0.0209             |                    |                  | 0.016746           | 1                   |
|             | 0.000057           | 0.00071                     | 0.013697           |                    |                  | 0.001277           | 1                   |
|             | 0.000054           | 0.002228                    | 0.0055889          | 0.014202           |                  |                    | 1                   |
|             | 0.0007             | 0.000744                    |                    | 0.005436           |                  |                    | 1                   |



|             |                    |                    |                    |                    |                 |                    |   |
|-------------|--------------------|--------------------|--------------------|--------------------|-----------------|--------------------|---|
|             |                    | 0.0043             |                    | 0.03067            |                 |                    | 1 |
|             |                    | 0.00071            |                    | 0.0318758          | 0.025307        |                    | 1 |
| <b>Mean</b> | <b>0.000378500</b> | <b>0.002165333</b> | <b>0.013395300</b> | <b>0.020545950</b> | <b>0.025307</b> | <b>0.009011500</b> | 1 |
| SST         | 0.0008             | 0.0053             | 0.0585             |                    |                 | 0.010237           | 1 |
|             | 0.0000             | 0.0000632          | 0.057189           |                    |                 | 0.015299           | 1 |
|             | 0.0000             | 0.00613            | 0.1002171          | 0.100134           |                 |                    | 1 |
|             | 0.0008             | 0.002593           |                    | 0.040525           |                 |                    | 1 |
|             |                    | 0.0053             |                    | 0.184336           |                 |                    | 1 |
|             | 0.0000632          |                    | 0.0518038          | 0.033623           |                 |                    | 1 |
| <b>Mean</b> | <b>0.000400000</b> | <b>0.003241567</b> | <b>0.071968700</b> | <b>0.094199700</b> | <b>0.033623</b> | <b>0.012768000</b> | 1 |

|             |                    |                    |                     |                    |                 |                    |   |
|-------------|--------------------|--------------------|---------------------|--------------------|-----------------|--------------------|---|
| Glut2       |                    | 0.0006             | 0.0462              |                    |                 | 0.118257           | 1 |
|             | 0.000291           | 0.000296           | 0.014067            |                    |                 | 0.016746           | 1 |
|             |                    | 0.000472           | 0.0898376           | 0.011486           |                 |                    | 1 |
|             | 0.000291           | 0.000282           |                     | 0.00174            |                 |                    | 1 |
|             |                    | 0.0006             |                     | 0.020404           |                 |                    | 1 |
|             | 0.000296           |                    | 0.0118063           | 0.045602           |                 | 1                  |   |
| <b>Mean</b> | <b>0.000291000</b> | <b>0.000424333</b> | <b>0.050034867</b>  | <b>0.011359075</b> | <b>0.045602</b> | <b>0.067501500</b> | 1 |
| GCK         | 0.0005             | 0.0129             | 0.0210              |                    |                 | 0.009552           | 1 |
|             | 0.0000493          | 0.000184           | 0.057648            |                    |                 | 0.010368           | 1 |
|             |                    | 0.003354           | 0.0217729           | 0.008975           |                 |                    | 1 |
|             | 0.0000493          | 0.001221           |                     | 0.000989           |                 |                    | 1 |
|             |                    | 0.0129             |                     | 0.011785           |                 |                    | 1 |
| 0.0005      | 0.000184           |                    | 0.0062738           | 0.051431           |                 | 1                  |   |
| <b>Mean</b> | <b>0.000274650</b> | <b>0.005123833</b> | <b>0.033473633</b>  | <b>0.007005700</b> | <b>0.051431</b> | <b>0.009960000</b> | 1 |
| Neurog3     | 0.0009             | 0.0119             | 0.0957              |                    |                 |                    | 1 |
|             | 0.0000             | 0.000171           | 0.007147            |                    |                 |                    | 1 |
|             | 0.035355           | 0.035403           | 0.4329334           | 0.1931             |                 |                    | 1 |
|             | 0.01093            | 0.258947           |                     | 0.267724           |                 |                    | 1 |
|             | 0.0009             | 0.0119             |                     | 0.083565           | 0.108045        | 0.035072           | 1 |
|             | 0.000171           |                    | 0.062727            |                    | 0.071794        | 1                  |   |
| <b>Mean</b> | <b>0.009600</b>    | <b>0.0530820</b>   | <b>0.1785933</b>    | <b>0.1517790</b>   | <b>0.108045</b> | <b>0.0534330</b>   | 1 |
| Pax4        | 0.0000             | 0.0010             | 0.0548              |                    |                 |                    | 1 |
|             | 0.0000             | 0.000408           | 0.003721            |                    |                 |                    | 1 |
|             | 0.000782           | 0.001642           | 0.004928            | 0.085034           |                 |                    | 1 |
|             | 0.000542           | 0.000554           |                     | 0.174949           |                 |                    | 1 |
|             | 0.00001            | 0.001              |                     | 0.001651           | 0.00000         |                    | 1 |
|             | 0.000408           |                    | 0.009713            |                    | 0.005759        | 1                  |   |
| <b>Mean</b> | <b>0.000240</b>    | <b>0.0008353</b>   | <b>0.0211496667</b> | <b>0.067836750</b> | <b>0.00000</b>  | <b>0.005759</b>    | 1 |

|             | Undiff           | End of in vitro diff | 6 months            | 8 months           | 12 months       | 18 months        | Human Islets |
|-------------|------------------|----------------------|---------------------|--------------------|-----------------|------------------|--------------|
| RFX6        | 0.0011           | 0.0015               | 0.0139              |                    |                 |                  | 1            |
|             | 0.0000           | 0.0000               | 0.000877            |                    |                 |                  | 1            |
|             | 0.000883         | 0.000589             | 0.0071395           | 0.010434           |                 |                  | 1            |
|             | 0.00119          | 0.000379             |                     | 0.015772           |                 |                  | 1            |
|             | 0.0011           | 0.0015               |                     |                    | 0.05685         |                  | 1            |
|             |                  | 0.00001              |                     | 0.0078789          |                 | 0.042689         | 1            |
| <b>Mean</b> | <b>0.0008200</b> | <b>0.0006630</b>     | <b>0.00730533</b>   | <b>0.01136133</b>  | <b>0.05685</b>  | <b>0.042689</b>  | <b>1</b>     |
| Neurod1     | 0.0196           | 0.0113               | 0.1200              |                    |                 |                  | 1            |
|             | 0.000531         | 0.0000               | 0.009164            |                    |                 |                  | 1            |
|             | 0.012972         | 0.004245             | 0.0468788           | 0.066899           |                 |                  | 1            |
|             | 0.0057           | 0.001929             |                     | 0.116598           |                 |                  | 1            |
|             | 0.0196           | 0.0113               |                     |                    | 0.543067        |                  | 1            |
|             |                  | 0.00001              |                     |                    |                 | 0.632878         | 1            |
| <b>Mean</b> | <b>0.011660</b>  | <b>0.0047973</b>     | <b>0.0586806667</b> | <b>0.09174850</b>  | <b>0.543067</b> | <b>0.632878</b>  | <b>1</b>     |
| Nes         | 0.2883           | 0.5838               | 0.0227              |                    |                 |                  | 1            |
|             | 0.0045           | 0.0018               | 0.001287            |                    |                 |                  | 1            |
|             | 0.086009         | 0.63728              | 0.0585288           | 0.001093           |                 |                  | 1            |
|             | 0.089522         | 0.217161             |                     | 0.04292            |                 |                  | 1            |
|             | 0.2883           | 0.5838               |                     | 0.001347           | 0.003464        | 0.018315         | 1            |
|             |                  | 0.0018               |                     | 0.0209213          |                 | 0.016289         | 1            |
| <b>Mean</b> | <b>0.1513200</b> | <b>0.337606833</b>   | <b>0.0275050</b>    | <b>0.016570250</b> | <b>0.003464</b> | <b>0.0173020</b> | <b>1</b>     |
| MafA        | 0.0281           | 0.0061               | 0.0675              |                    |                 |                  | 1            |
|             | 0.000127         | 0.004301             | 0.010336            |                    |                 |                  | 1            |
|             | 0.002699         | 0.005563             | 0.0328061           | 0.028626           |                 |                  | 1            |
|             | 0.013335         | 0.004409             |                     | 0.025852           |                 |                  | 1            |
|             | 0.0281           | 0.0061               |                     | 0.018011           | 0.043439        | 0.00559          | 1            |
|             |                  | 0.004301             |                     | 0.0223155          |                 | 0.010525         | 1            |
| <b>Mean</b> | <b>0.014440</b>  | <b>0.0051290</b>     | <b>0.0368806667</b> | <b>0.0237010</b>   | <b>0.043439</b> | <b>0.0080575</b> | <b>1</b>     |

|             | <b>Undiff</b>   | <b>End of in vitro diff</b> | <b>6 months</b>     | <b>8 months</b>   | <b>12 months</b> | <b>18 months</b>  |   |
|-------------|-----------------|-----------------------------|---------------------|-------------------|------------------|-------------------|---|
| MafB        | 0.0079          | 0.0408                      | 0.0094              |                   |                  |                   | 1 |
|             | 0.039046        | 0.282286                    | 0.001359            |                   |                  |                   | 1 |
|             | 0.004155        | 0.018199                    | 0.0240565           | 0.003422          |                  |                   | 1 |
|             | 0.011023        | 0.006499                    |                     | 0.002712          |                  |                   | 1 |
|             | 0.0079          | 0.0408                      |                     | 0.002107          | 0.028425         |                   | 1 |
|             |                 | 0.282286                    |                     |                   |                  | 0.003545          | 1 |
| <b>Mean</b> | <b>0.013980</b> | <b>0.1118116667</b>         | <b>0.0116050</b>    | <b>0.0027470</b>  | <b>0.028425</b>  | <b>0.003545</b>   | 1 |
| OCT4        | 0.0024          | 0.0695                      | 0.0681              |                   |                  |                   | 1 |
|             | 0.000735        | 0.001563                    | 0.003448            |                   |                  |                   | 1 |
|             | 0.009347        | 0.046071                    | 0.02785             | 0.000454          |                  |                   | 1 |
|             | 0.007716        | 0.013185                    |                     | 0.003321          |                  |                   | 1 |
|             | 0.0024          | 0.0695                      |                     | 0.001568          | 0.0000           | 0.002131          | 1 |
|             |                 | 0.001563                    |                     | 0.0114751         |                  | 0.000772          | 1 |
| <b>Mean</b> | <b>0.004500</b> | <b>0.0335636667</b>         | <b>0.0331326667</b> | <b>0.00420450</b> | <b>0.0000</b>    | <b>0.00145150</b> |   |
